# Supplementary material for: Differences in Intracellular Fate of Two Spotted Fever Group Rickettsia in Macrophage-Like Cells
Source: PubMed Central journal article supplement (PMC4965480; doi:10.3389/fcimb.2016.00080), 2016-07-29
Supplement: DataSheet1.pdf [file DataSheet1.pdf]

## *Supplementary Material*

### **Differences in intracellular fate of two spotted fever group *Rickettsia* in macrophage-like cells**

**Authors:** Pedro Curto<sup>1,2,3,5</sup>, Isaura Simões<sup>3,4,5</sup>, Sean P. Riley<sup>5</sup>, Juan J. Martinez<sup>5\*</sup>

#### **Affiliations:**

<sup>1</sup>PhD Programme in Experimental Biology and Biomedicine, Center for Neuroscience and Cell Biology, University of Coimbra, Portugal;

<sup>2</sup>Institute for Interdisciplinary Research, University of Coimbra, Portugal.

<sup>3</sup>CNC-Center for Neuroscience and Cell Biology, Coimbra, Portugal

<sup>4</sup>Biocant, Biotechnology Innovation Center, Cantanhede, Portugal

<sup>5</sup>Vector Borne Disease Laboratories, Department of Pathobiological Sciences, LSU School of Veterinary Medicine, Baton Rouge, LA, United States

**\*Corresponding author:** Juan J. Martinez: [jmartinez@lsu.edu](mailto:jmartinez@lsu.edu)

#### **Supplementary Movie 1 | THP-1-derived macrophages at 60 minutes post infection with *R. montanensis***

This movie corresponds to Figure 5A and represents a 360 degrees rotation movie of the 3D projection of the stack of images (generated with 3D Viewer, ImageJ). Frame rate, 14 fps. (MOV, 1.35 MB)

#### **Supplementary Movie 2 | THP-1-derived macrophages at 24 hours post infection with *R. montanensis***

This movie corresponds to Figure 5C and represents a 360 degrees rotation movie of the 3D projection of the stack of images (generated with 3D Viewer, ImageJ). Frame rate, 14 fps. (MOV, 1.79 MB)

#### **Supplementary Movie 3 | Vero cells at 60 minutes post infection with *R. montanensis***

This movie corresponds to Supplementary Figure 4A and represents a 360 degrees rotation movie of the 3D projection of the stack of images (generated with 3D Viewer, ImageJ). Frame rate, 14 fps. (MOV, 1.04 MB)

#### **Supplementary Movie 4 | Vero cells at 24 hours post infection with *R. montanensis***

This movie corresponds to Supplementary Figure 4C and represents a 360 degrees rotation movie of the 3D projection of the stack of images (generated with 3D Viewer, ImageJ). Frame rate, 14 fps. (MOV, 739.35 KB)

**Supplementary Movie 5 | THP-1-derived macrophages at 60 minutes post infection with *R. conorii***

This movie corresponds to Figure 6A and represents a 360 degrees rotation movie of the 3D projection of the stack of images (generated with 3D Viewer, ImageJ). Frame rate, 14 fps. (MOV, 1.3 MB)

**Supplementary Movie 6 | THP-1-derived macrophages at 24hours post infection with *R. conorii***

This movie corresponds to Figure 6C and represents a 360 degrees rotation movie of the 3D projection of the stack of images (generated with 3D Viewer, ImageJ). Frame rate, 14 fps. (MOV, 1.9 MB)

**Supplementary Movie 7 | Vero cells at 60 minutes post infection with *R. conorii***

This movie corresponds to Supplementary Figure 5A and represents a 360 degrees rotation movie of the 3D projection of the stack of images (generated with 3D Viewer, ImageJ). Frame rate, 14 fps. (MOV, 747.97 KB)

**Supplementary Movie 8 | Vero cells at 24 hours post infection with *R. conorii***

This movie corresponds to Supplementary Figure 5C and represents a 360 degrees rotation movie of the 3D projection of the stack of images (generated with 3D Viewer, ImageJ). Frame rate, 14 fps. (MOV, 2.13 MB)

**Supplementary Movie 9 | THP-1-derived macrophages at 60 minutes post infection with *R. montanensis***

This movie corresponds to Figure 7B and represents a 360 degrees rotation movie of the 3D projection of the stack of images (generated with 3D Viewer, ImageJ). Frame rate, 14 fps. (MOV, 1.02 MB)

**Supplementary Movie 10 | THP-1-derived macrophages at 24 hours post infection with *R. montanensis***

This movie corresponds to Figure 7C and represents a 360 degrees rotation movie of the 3D projection of the stack of images (generated with 3D Viewer, ImageJ). Frame rate, 14 fps. (MOV, 2.77 MB)

**Supplementary Movie 11 | THP-1-derived macrophages at 60 minutes post infection with *R. conorii***

This movie corresponds to Figure 8B and represents a 360 degrees rotation movie of the 3D projection of the stack of images (generated with 3D Viewer, ImageJ). Frame rate, 14 fps. (MOV, 1.98 MB)

**Supplementary Movie 12 | THP-1-derived macrophages at 24 hours post infection with *R. conorii***

This movie corresponds to Figure 8D and represents a 360 degrees rotation movie of the 3D projection of the stack of images (generated with 3D Viewer, ImageJ). Frame rate, 14 fps. (MOV, 1.68 MB)

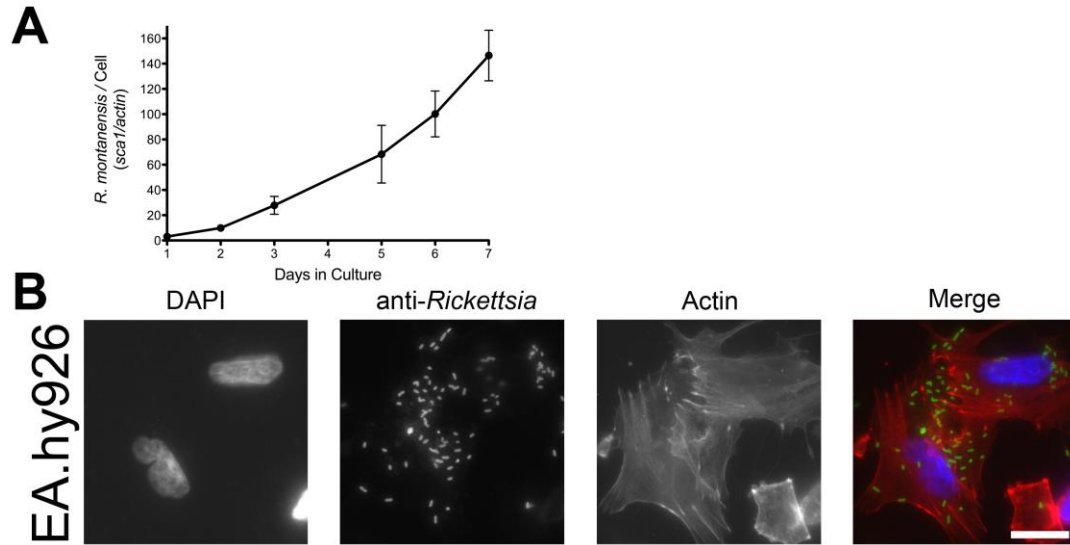

**Supplementary Figure 1 | Ability of *R. montanensis* to invade and proliferate within human endothelial cells, EA.hy926. (A)** EA.hy926 cells were infected with *R. montanensis* and genomic DNA was extracted at different time-points after infection. Quantitative PCR data are expressed as the ratio of *R. montanensis sca1* versus *actin* DNA content. **(B)** Immunofluorescence microscopy of EA.hy926 cells infected with *R. montanensis* at 3 days post-infection. Cells were stained with DAPI (blue) to identify host nuclei, Phalloidin (red) to stain actin and NIH/RML I7198 followed by Alexa Fluor 488 (green) to stain *R. montanensis*. Scale bar = 10  $\mu$ m.

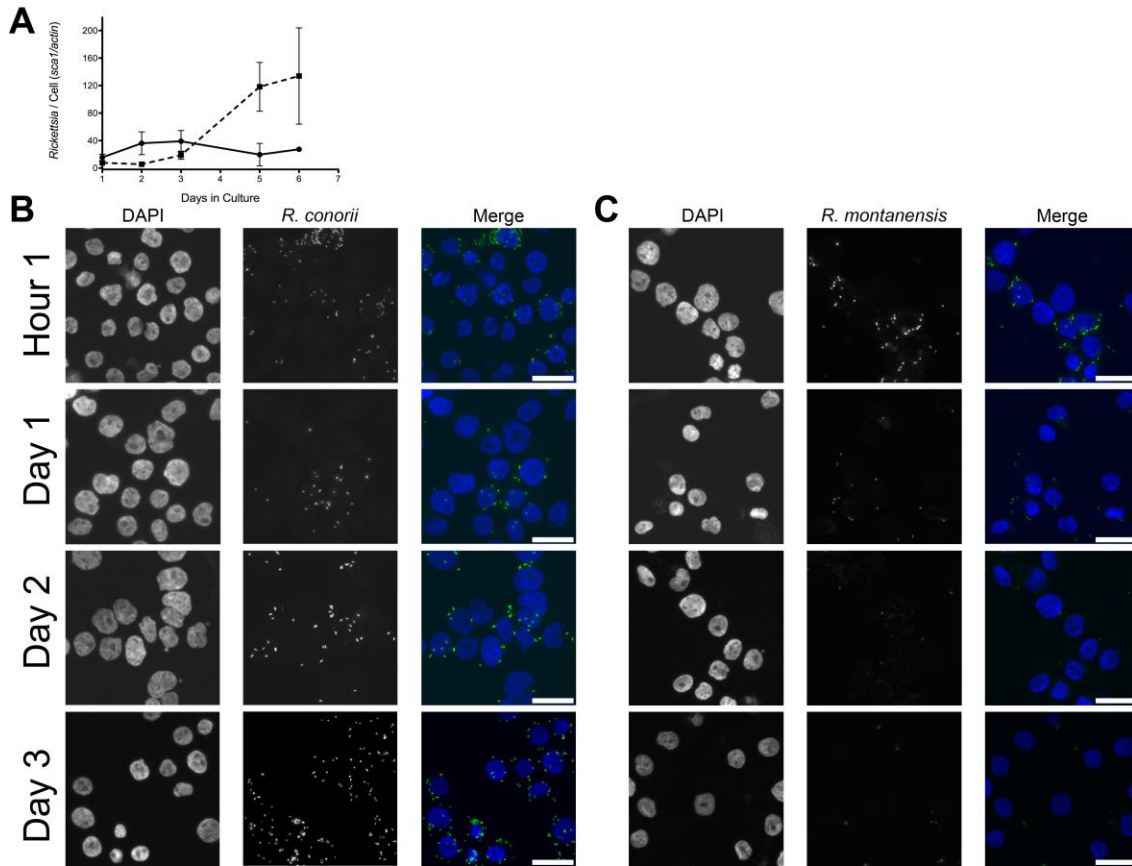

**Supplementary Figure 2 | *R. conorii* and *R. montanensis* show a different ability to proliferate within undifferentiated THP-1 cells.** (A) Undifferentiated THP-1 cells were infected with *R. montanensis* (solid line) and *R. conorii* (dashed line) and genomic DNA was extracted at different time-points after infection. Quantitative PCR data are expressed as the ratio of *R. montanensis* or *R. conorii sca1* versus *actin* DNA content. (B) Immunofluorescence microscopy of undifferentiated THP-1 cells infected with *R. conorii* at 1 h, and 1, 2, and 3 days post-infection, respectively. (C) Immunofluorescence microscopy of undifferentiated THP-1 cells infected with *R. montanensis* at 1 h, and 1, 2, and 3 days post-infection, respectively. Cells were stained with DAPI (blue) to identify host nuclei, and anti-R<sub>CPFA</sub> or NIH/RML I7198, followed by Alexa Fluor 488 (green) to stain *R. conorii* or *R. montanensis*, respectively. Scale bar = 10  $\mu$ m.

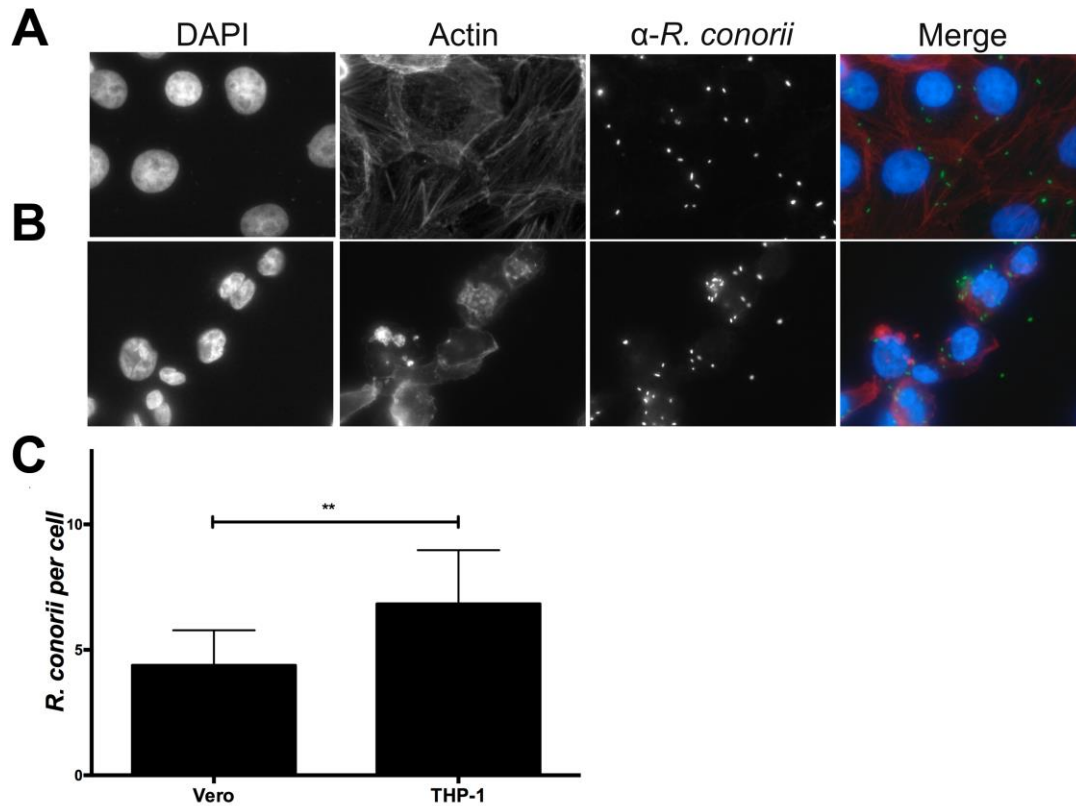

**Supplementary Figure 3 | Unlike *R. montanensis*, adherence of *R. conorii* to THP-1-derived macrophages is not decreased.** PMA-differentiated THP-1 cells and Vero cells were infected with *R. conorii* (MOI=10). After 60 min of infection, cells were fixed and stained for immunofluorescence analysis with anti-R<sub>CPFA</sub> followed by Alexa Fluor 488 (green) to stain *R. conorii*, DAPI to visualize the host nuclei (blue) and Phalloidin to illustrate the host cytoplasm (red). **(A and B)** Representative immunofluorescence images of *R. conorii* association assays in Vero (A) and macrophage-like (B) cells. Each row shows, from the left to right, nuclei staining, actin staining, rickettsia staining and merged images. Scale bar = 10  $\mu$ m. **(C)** Rickettsia and mammalian cells were counted and results are expressed as the ratio of rickettsia to mammalian cells. At least 200 nuclei were counted for each experimental condition. Results are shown as the mean  $\pm$  SD (P values: \*\* < 0.01).

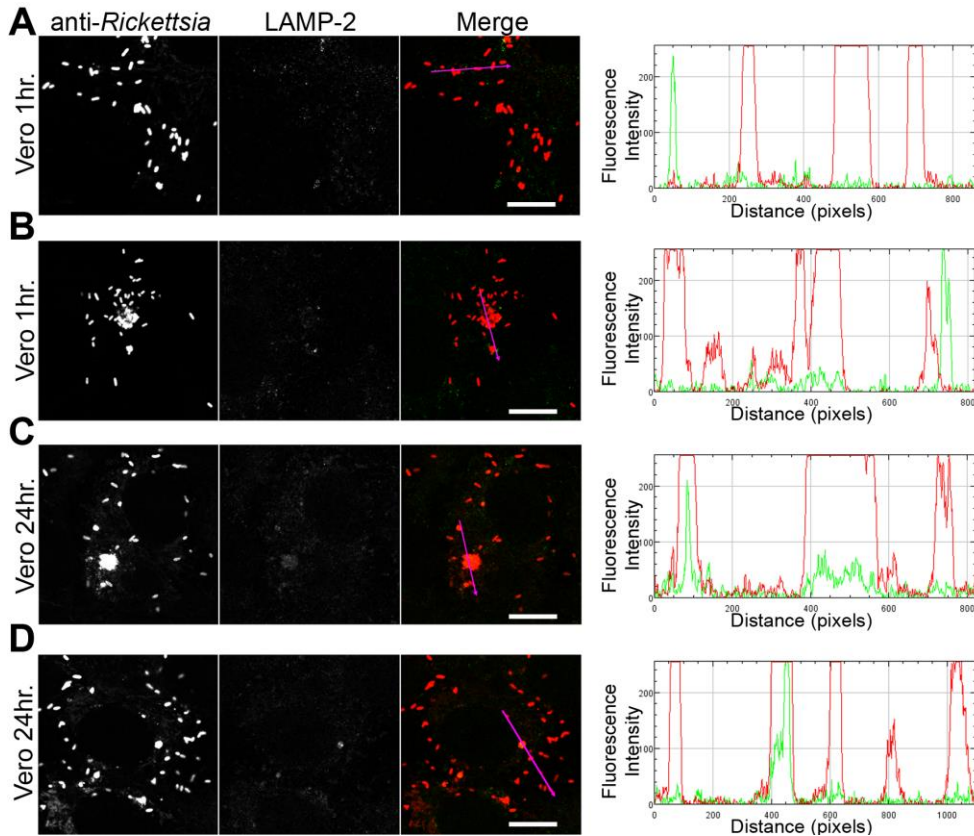

**Supplementary Figure 4 | *R. montanensis* is maintained mostly as morphologically intact bacteria in Vero cells.** Vero cells were infected with *R. montanensis* (MOI=10). At 60 min or 24 h post infection, cells were fixed, permeabilized and double stained for immunofluorescence confocal microscopy analysis with NIH/RML I7198 followed by Alexa Fluor 546 (red) to stain *R. montanensis* and the monoclonal antibody for LAMP-2, lysosomal membrane protein followed by Alexa Fluor 488 (green). (A-D) Representative images of a single slice from the z stacks. Vero cells at 60 min post infection (A and B) and 24 h post infection (C and D). Each row shows, from left to right, *Rickettsia* staining, LAMP-2 staining, the merged image, and a RGB plot profile illustrating the fluorescence intensity along the magenta arrow. Scale bar = 10  $\mu$ m. Supplementary movies 3 and 4 represent 360 degrees rotation movie of the 3D projection of the stack images shown in panels 4A and 4C, respectively.

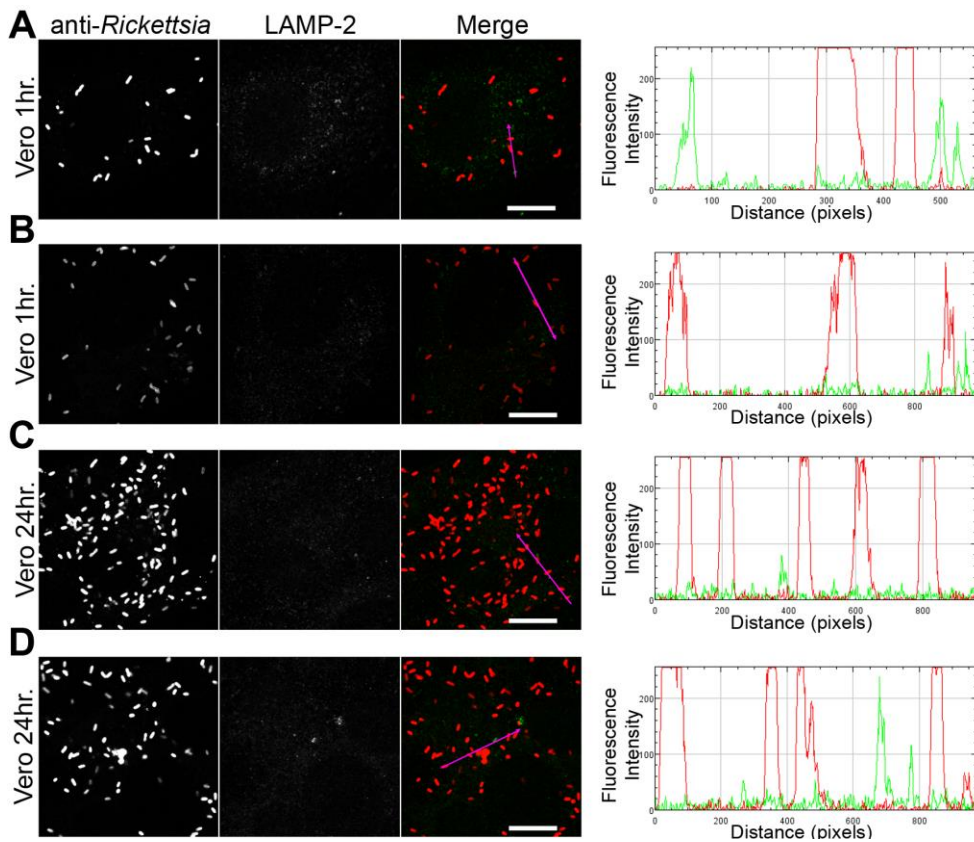

**Supplementary Figure 5 | *R. conorii* maintains an intact morphology in Vero cells.** Vero cells were infected with *R. conorii* (MOI=10). At 60 min or 24 h post infection, cells were fixed, permeabilized and double stained for immunofluorescence confocal microscopy analysis with anti-R<sub>CPFA</sub> followed by Alexa Fluor 546 (red) to stain *R. conorii* and the monoclonal antibody for LAMP-2, lysosomal membrane protein followed by Alexa Fluor 488 (green). (A-D) Representative images of a single slice from the z stacks. Vero cells at 60 min post infection (A and B) and 24 h post infection (C and D). Each row shows, from left to right, *Rickettsia* staining, LAMP-2 staining, the merged image, and a RGB plot profile illustrating the fluorescence intensity along the magenta arrow. Scale bar = 10  $\mu$ m. Supplementary movies 7 and 8 represent 360 degrees rotation movie of the 3D projection of the stack images shown in panels 5A and 5C, respectively.



```

cco_RC1273      MANISFKLFOKAIQQQLFAALFTTSTAAILMSSSSGALIVASVITATNNNAAFSDVWVNN
cco_MCI_03620  *****
cco_RC1273      WNEITAAQVANGTFAFGQNNWAFYVSGDTITADVAHDIITAINVAUTTFIQLNIAQNT
cco_MCI_03620  *****
cco_RC1273      VVGSIVTGGNLFVITIAKSLTLNNDANANHFQAFAMVYDLOHIALGQANBALI
cco_MCI_03620  *****
cco_RC1273      QSAAFAKITLAGNIGGGIITVKTDAIINSTIGNTALATVWVAGIATLBSAIIKATT
cco_MCI_03620  *****
cco_RC1273      KLFNAASVLTINNAVLTGAIINTTGGDINWVNLNGALSQVTRIGNTALATI SVGA
cco_MCI_03620  *****
cco_RC1273      GKATLGSAAIKATTKLTINASAVTFNF--VYVTAIDNTGNANNGIVFTFG--DSTVFG
cco_MCI_03620  *****
cco_RC1273      NIQNTALATI SVSAGKATLGSAAIKATTKLTINASAVTFNF-----
cco_MCI_03620  *****
cco_RC1273      -----
cco_MCI_03620  VSVLNLNGALSQVTRIGNTNSLATISVSGATLGSAAIKATTKLTINNSVLLTIAN
-----
cco_RC1273      SVLTAIDNTTGGDINWVNLNGALSQVTRIGNTNSLATISIGATLGSAAIKATK
cco_MCI_03620  *****
cco_RC1273      -----VYVTAIDNTGNANNGIVFTFG--DSTVFGIGNTALATI SVGA
cco_MCI_03620  *****
cco_RC1273      GKATLGSAAIKATTKLTINASAVTFNF--VYVTAIDNTGNANNGIVFTFG--DSTVFG
cco_MCI_03620  *****
cco_RC1273      NIQNTALATI SVSAGKATLGSAAIKATTKLTINASAVTFNF--VYVTAIDNTGNANNGI
cco_MCI_03620  *****
cco_RC1273      GIVFTFG--DSTVFGIGNTALATI SVSAGKATLGSAAIKATTKLTINASAVTFNF--
cco_MCI_03620  *****
cco_RC1273      VYVTAIDNTGNANNGIVFTFG-----
cco_MCI_03620  AVLTAIDNTTGGDINWVNLNGALSQVTRIGNTNSLATISIGATLGSAAIKATK
*****
cco_RC1273      -----NSTVFGIGNTALATVWVGA
cco_MCI_03620  *****
cco_RC1273      GIATLGSAAIKATTKLTINASVLTINNAVLTGAIINTTGGDINWVNLNGALSQVTFG
cco_MCI_03620  *****
cco_RC1273      NIQNTALATI SVSAGKATLGSAAIKATTKLTINASAVTFNF--VYVTAIDNTGNANNGI
cco_MCI_03620  *****
cco_RC1273      IATFTGSDSTVFGIGNTALATVWVAGLLWQ@SVVKSNTIILITINASAVTFNFVYV
cco_MCI_03620  *****
cco_RC1273      GAIINTGNANNGIVFTFGSDSTVFGIGNTALATI SVSAGKATLGSAAIKATTKLTINA
cco_MCI_03620  *****
cco_RC1273      SAVTFNFVYVYTAIDNTGNANNGIVFTFGSDSTVFGIGNTALATVWVAGIATLQAGGS
cco_MCI_03620  *****
cco_RC1273      LQANNIDFQARSTLEFNGLDGGNATFVYFVGAANGNAILNNTKLDIAVHILTQV
cco_MCI_03620  *****
cco_RC1273      AEINIGAGNFAIDASAGDVTILNAQDIFHPALDGLVLSNLTQVWVNI LLAADLVAFG
cco_MCI_03620  *****
cco_RC1273      VDEGTVFQGVWVNLNLSWVAARIIGDVSQKPTLLIYNAVITTDQNLBHQVQLV
cco_MCI_03620  *****
cco_RC1273      INNAQFTSSTAFNAQTIQINDATYI DANNQNLIFAGNIFKFAHADQILQNSGNDR
cco_MCI_03620  *****
cco_RC1273      TITLGAINDPNDQDQIILNLSVYAGKLTLAGKTFGAKLQDIFVKGSDSTAGTT
cco_MCI_03620  *****
cco_RC1273      FNTTILVLDITQQLGAGTANVLFKDAVLTQDNIQGFLLNNAQNTIILANNVVA
cco_MCI_03620  *****
cco_RC1273      GTVNTGSDTNGTILVIGASNLNENVNGIAMLKVAAGVITFARQNVKLSIGQSTWLT
cco_MCI_03620  *****
cco_RC1273      LEAFKLTGSIKNTGQALKLNPNNGSSVGVVTAANSVGDITAGATSPASVNAKGT
cco_MCI_03620  *****
cco_RC1273      ATLGSTISFAHTFNTGAVTLAKGSLTSFAKVTATSPVANSATINFGSLAFNSITG
cco_MCI_03620  *****
cco_RC1273      GTTLTGAQVYTYTQSTFTDITLMTFQGAQKSGNLLKSSGTLDSGVNLAIVYT
cco_MCI_03620  *****
cco_RC1273      AWFQHNISFDKTYVI SAETAGSLKPTKEDNKVITINNDKRVDFTEASTLTLFAD
cco_MCI_03620  *****
cco_RC1273      IAAQVDEDFAFQGLANIIPHAANI KQSLKMLMEDAFNGSDARQAFNNGIIMPTLQADAT
cco_MCI_03620  *****
cco_RC1273      THLMQDVKESDITAAWNVVAENISNITALBARHDKVQAKKQPVSSGDEHDAKFG
cco_MCI_03620  *****
cco_RC1273      AMISFFVGNATQMCNCSI SSKYSSTQSTGTFQDFVSDLVGLAVYHARDIKLKNKKT
cco_MCI_03620  *****
cco_RC1273      GDNKVESNIYSLVGLVSPVEMFLVFAIASVSNKIKRSKRVIATLLETVQVQANAK
cco_MCI_03620  *****
cco_RC1273      YKSESYTGQMAQYTYMFMENILMFLAGLVSTIKKQSYKSTQTYQNLIVKSNQNTF
cco_MCI_03620  *****
cco_RC1273      DGLLGAQVSNINWELVLEELVAVDQAFQKVSALDARLQMTAFLPTNSFKQSKTS
cco_MCI_03620  *****
cco_RC1273      FQVGVYTAQKHMMEYI NYDTMI GSKYFAQQSSVIVVNF
cco_MCI_03620  *****

```

**Supplementary Figure 6 | Amino acid sequence alignment of Sca0 protein from *R. conorii* and *R. montanensis*.** Amino acid sequences of rickettsial Sca0 from *R. conorii* (RC1273) and *R. montanensis* (MCI\_03620) were aligned using the ClustalW software. The alignment resulted in a percentage of sequence identity of 75.36 %.

```

cco_RC0019      MKKLTQHLKRSFLRTYLLASISVGV--AAIFPFGMMMSKFAFDLISKLLNBYGQIN
rno_MCI_04265  MKKLTQHLKRSFLRTYLLASISVGVIIAIFPFGMMMSKFAFDLISKLLNBYGQIN
*****

cco_RC0019      GYKDTN----NTFQIGQIVVSEKLTITTSSEIRMKISNPKASNFKLVDPVDEHY
rno_MCI_04265  GYKDTNPTDPTTQIGIVVSEKLTITTSSEIRMKISNPKASNFKLVDPVDEHY
*****

cco_RC0019      KVVAKSSDVGATARKVRPITRCKTFAGLEKTKQNTTTFESTQMPQKFIITASPT
rno_MCI_04265  KVVAKSSDVGATARKVRPITRCKTFAGLEKTKQNTTTFESTQMPQKFIITASPT
*****

cco_RC0019      VSAHNSIFANNTMTLITFSEHETTAATGTFSTATPTFQSDSEHNSLQAMTFPI
rno_MCI_04265  VSAHNSIFANNTMTLITFSEHETTAATGTFSTATPTFQSDSEHNSLQAMTFPI
*****

cco_RC0019      NTSKAVRLLSFSSSGQQAVQSSQVSEVFFKTFVFLPKESSTETVAGVNSISR
rno_MCI_04265  NTSKAVRLLSFSSSGQQAVQSSQVSEVFFKTFVFLPKESSTETVAGVNSISR
*****

cco_RC0019      VHEMIGIKLAVTQALDITD-KDKERLQKLTQLTFTQRTKLRKAEIETKIKIGE
rno_MCI_04265  VHEMIGIKLAVTQALDITD-KDKERLQKLTQLTFTQRTKLRKAEIETKIKIGE
*****

cco_RC0019      NKKIKLLEKELTSKNSADRLFKIKIKIDIPANKVSIKQVTVVTTASTVFAQAQQ
rno_MCI_04265  NKKIKLLEKELTSKNSADRLFKIKIKIDIPANKVSIKQVTVVTTASTVFAQAQQ
*****

cco_RC0019      ARINEARQVFNKNSGGNAKRSAG----TRKKEKQEAQKSEIKQKKAITAS
rno_MCI_04265  ARINEARQVFNKNSGGNAKRSAG----TRKKEKQEAQKSEIKQKKAITAS
*****

cco_RC0019      DKAKVAAAKETSNTALBAMQDK-----LLTVVNSSTGTYKQFP
rno_MCI_04265  DKAKVAAAKETSNTALBAMQDK-----LLTVVNSSTGTYKQFP
*****

cco_RC0019      KATPTPLSHGQRILGQFDEEGVIVPEKQQQFQRIEDP-----
rno_MCI_04265  KATPTPLSHGQRILGQFDEEGVIVPEKQQQFQRIEDP-----
*****

cco_RC0019      SFTLSEKEDVGFYSGWHEFTQAANVNSLEONLVGMQQIQEHRSEVGGQFHE
rno_MCI_04265  SFTLSEKEDVGFYSGWHEFTQAANVNSLEONLVGMQQIQEHRSEVGGQFHE
*****

cco_RC0019      SKDIYKAFVSYNYLNSIQPMQSQIQDVIDGLATEMRFADQFQKRIKIALAS
rno_MCI_04265  SKDIYKAFVSYNYLNSIQPMQSQIQDVIDGLATEMRFADQFQKRIKIALAS
*****

cco_RC0019      IKATGELFKVYKIQARILETQKVTQAKISQSTARYENSRKSIIVLSRSSAKSVI
rno_MCI_04265  IKATGELFKVYKIQARILETQKVTQAKISQSTARYENSRKSIIVLSRSSAKSVI
*****

cco_RC0019      SENFEKESALLQTTTTDESLSQNMWNPAPTSSSKLDEKLELDLQADAFVQNLQFP
rno_MCI_04265  SENFEKESALLQTTTTDESLSQNMWNPAPTSSSKLDEKLELDLQADAFVQNLQFP
*****

cco_RC0019      DTLLTETLGLITPTQNTVAKSDSERNNVSSISIKQLQSEMMETGLGDDLDL
rno_MCI_04265  DTLLTETLGLITPTQNTVAKSDSERNNVSSISIKQLQSEMMETGLGDDLDL
*****

cco_RC0019      HVT-----PQTLTKSTLVSSK
rno_MCI_04265  HVT-----PQTLTKSTLVSSK
*****

cco_RC0019      EKQNIIRKAVSVKSVLQTVNENSRKEDGKSTKQRTVQSGRFGHAWGNHKSLSL
rno_MCI_04265  EKQNIIRKAVSVKSVLQTVNENSRKEDGKSTKQRTVQSGRFGHAWGNHKSLSL
*****

cco_RC0019      SVVSGCIKATQILISLDAKRTAIDQTFSPQRKSVLWLEIENDVREAIKIQKLVQV
rno_MCI_04265  SVVSGCIKATQILISLDAKRTAIDQTFSPQRKSVLWLEIENDVREAIKIQKLVQV
*****

cco_RC0019      LKPKEDIKATNAKAKKIDAKSADHFNKILETDVDFPQNSHSHMTAMMLLP
rno_MCI_04265  LKPKEDIKATNAKAKKIDAKSADHFNKILETDVDFPQNSHSHMTAMMLLP
*****

cco_RC0019      ENLAVTPTNVSLYNSPQAQFQEDHKIINDRSQG-----
rno_MCI_04265  ENLAVTPTNVSLYNSPQAQFQEDHKIINDRSQG-----
*****

cco_RC0019      RMLVSTIHKETVREITVDASITNTAFPEVLEKRAL
rno_MCI_04265  RMLVSTIHKETVREITVDASITNTAFPEVLEKRAL
*****

cco_RC0019      LRSQRLNLDVSTIKRSTQPLNSITTESVSTENLASETTETEPKPEIYVNTWYKR
rno_MCI_04265  LRSQRLNLDVSTIKRSTQPLNSITTESVSTENLASETTETEPKPEIYVNTWYKR
*****

cco_RC0019      KLPIPLFRSARLQKLETLDLKDLVLEKARLVKKEKAIKLVQDPENLEKFLAME
rno_MCI_04265  KLPIPLFRSARLQKLETLDLKDLVLEKARLVKKEKAIKLVQDPENLEKFLAME
*****

cco_RC0019      ADLSKESQGLKRNKALBAPYIKESSTDWILSTGIDISVILADAEKLSRSPF
rno_MCI_04265  ADLSKESQGLKRNKALBAPYIKESSTDWILSTGIDISVILADAEKLSRSPF
*****

cco_RC0019      VSLGDLNNSWMLKELSKHEKILANDYN-----KELDGLMKEK
rno_MCI_04265  VSLGDLNNSWMLKELSKHEKILANDYN-----KELDGLMKEK
*****

cco_RC0019      IWLGEIKHLDFEFKRVSEKVFSSSSVGSINSDDDLSRDTVFDVNLLEIN
rno_MCI_04265  IWLGEIKHLDFEFKRVSEKVFSSSSVGSINSDDDLSRDTVFDVNLLEIN
*****

cco_RC0019      KDTVYTVIRVLENKIQIKETQIKELGSSRSKELNHIKAMAVISNRIDVVELDEK
rno_MCI_04265  KDTVYTVIRVLENKIQIKETQIKELGSSRSKELNHIKAMAVISNRIDVVELDEK
*****

cco_RC0019      MLLAINAQGBDEKISLLEKAT-----DILQQLGLMVLVSEKSETLPADREGR
rno_MCI_04265  MLLAINAQGBDEKISLLEKAT-----DILQQLGLMVLVSEKSETLPADREGR
*****

cco_RC0019      D-----TEVSRQLSLPALASNSALALSDREKCALAGDSKEDSEYDSGFE
rno_MCI_04265  D-----TEVSRQLSLPALASNSALALSDREKCALAGDSKEDSEYDSGFE
*****

cco_RC0019      EETIQQLSDSDGMLKIEVDTVYIPLQAKKEMQIISNAPFLQKRVNIVVNHMI
rno_MCI_04265  EETIQQLSDSDGMLKIEVDTVYIPLQAKKEMQIISNAPFLQKRVNIVVNHMI
*****

cco_RC0019      ENLDSAMNNSMMVAAGDEEESHKGLMWRGMYTNNHGRVDNMTQRTGNKGTATI
rno_MCI_04265  ENLDSAMNNSMMVAAGDEEESHKGLMWRGMYTNNHGRVDNMTQRTGNKGTATI
*****

cco_RC0019      GFDAIDNNIVGLIATSNVSVKFKNSKNNKELINRVSIVTQKELPFAQLVSA
rno_MCI_04265  GFDAIDNNIVGLIATSNVSVKFKNSKNNKELINRVSIVTQKELPFAQLVSA
*****

cco_RC0019      SENFLDKETTYTGDKIASNVRHNSHTVEALMNTLQSKLITPMLGLVYKSRD
rno_MCI_04265  SENFLDKETTYTGDKIASNVRHNSHTVEALMNTLQSKLITPMLGLVYKSRD
*****

cco_RC0019      GVTNETGVQRIALTMKNNILSGIVSTVTVFLKDALKFNGLIFQGAVERNFKET
rno_MCI_04265  GVTNETGVQRIALTMKNNILSGIVSTVTVFLKDALKFNGLIFQGAVERNFKET
*****

cco_RC0019      QELNRRVKEIPDVFENYLIPOKPTSTNLTGTLIGSINKNTTSLDYNITLKHTRKRG
rno_MCI_04265  QELNRRVKEIPDVFENYLIPOKPTSTNLTGTLIGSINKNTTSLDYNITLKHTRKRG
*****

cco_RC0019      SVKLVNVL
rno_MCI_04265  SVKLVNVL

```

**Supplementary Figure 7 | Amino acid sequence alignment of Sca1 protein from *R. conorii* and *R. montanensis*.** Amino acid sequences of rickettsial Sca1 from *R. conorii* (RC0019) and *R. montanensis* (MCI\_04265) were aligned using the ClustalW software. The alignment resulted in a percentage of sequence identity of 60.15 %.

```

rc0110      MNLQNSHSKRYVLTFFMSTCLLTSFSLTSARAASFHDLVSKTFAWEKHNSTQQQNIWKD
mci_04765  MNLQNSYSKRYVLTFFMSTCLLTSFSLTSARAASFHDLVSKNFWEKHNSTQQQNIWKD
.....

rc0110      LTENEKIKWQEAALVPSFTQAQNDLGIKYKETDLSSEFLNTRHARQARAEILLYIERV
mci_04765  LTENEKIKWQEAALVPSFTQAQNDLGIKYKETDLSSEFLNTRHARQARAEILLYIERI
.....

rc0110      KQDFDTKQAYINQGVVPTDIEAATNLGIVSDPSKIDNNVHQKVRRAEKDKKAVIEL
mci_04765  KQDFDTKQAYINQGVVPTDIEAATNLGIVSDPSKIDNNVENDQKVRRAEKDKKAVI GL
.....

rc0110      YVSSINRGIKYGHVYVNDIIPFIEQEVRTALNNKDDAQSFVASIRTEIMENAKQVIADS
mci_04765  YVSSINRGIKYGHVYVNDIIPAMKEVRTALNNKDDAQSFVASIRTEIMENAKQVIADS
.....

rc0110      HIFTEKELKPKFISRDINRQVYIKSIRLKVMDKPKQYIADSHIPEKELKQKFGADKG
mci_04765  HIFTEQEFKRFISRDINRQVYIKSIRLKVMDKPKQYIADSHIPEKELKQKFGADKG
.....

rc0110      EATNYIASIATQMLGKKSYYIDNNIIPNADELMEFKIGPVKATSYINQIRAGIEANQF
mci_04765  EATNYIASIATQMLGKKSYYIDNNIIPNADELMEFKIGKIKANSYIDQIRAGMGANQF
.....

rc0110      LNNDDTKFSTGRSKNSGKSNHNMWMSNQSNNTGTSAKIVTGREKQYVFPFISTFK
mci_04765  LNNDDTKFSTGRSKNSGKSNHNMWMSNQSNNTGTSSGYSTGRKQVFPFISTFK
.....

rc0110      TYNTKASKGNLTSQHNINRIIQOENIEEENKLIKTDPEIAALTLQVDSYKQEAVTTI
mci_04765  TYNTKASKGNLTSQHNINRIIQOENIEEENKLIKTDPEIAALMLVGSYKQEAVTTI
.....

rc0110      LSFNDDTIQRVLSNDKGLDFNTNIDVKNRPILOELNENSSSEKTFABRIQDVATR
mci_04765  LSFNDDTIQRVLSNDKGLDFNTNIDVKNRPILOELNENSSSEKTFABRIQDVATR
.....

rc0110      NISNSQFEKARLDLILKLAASKDKSSVENFLQLQLELNRMQPVVNVSVILTEIVKEI
mci_04765  NISNSQFEKARLDLILKLAASKDKSSVENFLALQLELNRMQPVVNVSVILTEIVKEI
.....

rc0110      NIELKNGKGLRDSLRKDMIKLAKAVNNHTLNSVIVKVLSDSKILSNENKILGLAVSN
mci_04765  NIELKNGKGLRDSLRKDMIKLAKAVNNHTLNSVIVKVLSDSNMLSNENKILGLAAGN
.....

rc0110      ANLEQTSQGIPIPNFPLPLNGGIPNPFPLPLNGSMFPFPP--LHSQGFSSNKHFDLNLQ
mci_04765  ANLEQTSQGIPIPNFPLPLNGGIPNPFPLPLNGSMFPFPP--LNSQGFSSNNDLNLQ
.....

rc0110      TEVPHISLVQFTNHTVQSKAPLOFTASSATSTGRSTPETAVAKLYAEVRETGGKA
mci_04765  TEVPHISLVQFTNHTVQSKAPLOFTASSATSTGRSTPETAVAKLYAEVRETGGKA
.....

rc0110      NDLDQLIKRQADLNVIQRLITESYANQGADEKTLNLFESTPEIAEKAKAFNLAQ
mci_04765  NDLDQLIKRQADLNVIQRLITESYANQGADEKTLNLFESTPEIAEKAKAFNLAQ
.....

rc0110      DQYIKDITVNGKTTITSEELIKNLFENDDDAKRIILSSCKIIBELKPIIKLEFNSEL
mci_04765  DQYIKDITVNGKTTITSEELIKNLFENDDDAKRIILSSCKIIBELKPIIKLEFNSEL
.....

rc0110      IRELQKQNFKQLEFVINTNMFQDIPGRNIDELINNNPILVQQAFLTKEDTNLR
mci_04765  IRELQKQNFQLEFVINTNMFQDIPGRNIDELINNNPILVQQAFLTIKEDTNLR
.....

rc0110      KTIINSQAQAKLDDLRATLSTIKIEELITANLPQHDFIAIVREKDPPELLKFLKATLT
mci_04765  KTIINSQAQAKLDDLRATLSTIKIEELITANLPQHDFIAIVREKDPPELLKFLKATTK
.....

rc0110      VTGNNLDQLRALPSFTGMSNEQIRILSNKLMKSIILKALKECSQEKATQYIHTGMPP
mci_04765  VTGNNLDQLRALPSFTGMSNEQIRILSNKLMKSIILKALKECSQEKARHIIHTGMPP
.....

rc0110      FFFPPPLEDSQDELELAKSLGI TWANT--STFKTPTKYHSSDIALYKFEFTLSGQK
mci_04765  FFFPPPLEDSQDELELAKSLGI TWANT--STFKTPTKYHSSDIAVRYKFEFTLSGQK
.....

rc0110      SAGYKAKYSDADLLKKAIVESVAFESHNLKSAHQNNKYEIQKAVNTMYSFPIGHRTE
mci_04765  SAGYKAKYSDANLKAIVESVAFESHNLKSAHQNNKYEIQKAVNTMHSFPIGPRTE
.....

rc0110      LEQKHNITYSKLELTKDKKFIKYVEDNIILNKKLTAFTSADSDFI DSRTLEQKHN
mci_04765  LEQKHNITYSKLELTKDKKFIKYVEDNIILNKKLTAFTSADSDFI GPRTEIQKHN
.....

rc0110      IYIQQLTKYEEVKEAFNTASLDFIGPRTIEIQEVHNIYKSQLLELTKDELCLFQOV
mci_04765  IYIQQLTKYEEVKEAFNTASLDFIGPRTIEIQEVHNIYKSQLLELAKKLELFLVQVL
.....

rc0110      LAETLEQKYGSDIQSENSNNEKIVRLDQKQLFKENKATNDESSTKDDTQ----
mci_04765  LVSTLEQKYGSDIQSENSNNEKIGRLDPKRLFKQKRNKATNDESSTKDDTQSENSN
.....

rc0110      -----PEDSNKKEQSDSHTALS PRLLSNDNSHNDKSSDDKK
mci_04765  KKSEQSENEATNDESSTKDDTQPEDSNKKEQSDSHTALS PRLLSNDNSHNDKSSDDKK
.....

rc0110      SLLALSSDEDDTYATDEELEEEN----STTDEELKDVLESEDAIDUSFKTEAI
mci_04765  SLLALSSDEDDTYATDEELEEEN----STTDEELKDVLESEDAIDVSKTEAI
.....

rc0110      TEQDEVTRQVSDSTSRKVAI LVQATSTLHKPVHYMIN--DRLTVAAGAGDEETSINRG
mci_04765  TEQEVATQVSDSTSRKVAI LVKATSTLHKPVHYMILSDRLVAAGAGDEEASINRG
.....

rc0110      VWISGLYGNRQIRWNIPIYQNRRTGITIGTDAEFINSHDVI GAYSLESQIKYNNKL
mci_04765  VWISGLYDNRQGTWRNIPIYQNRRTGITIGTDAEFINSHDVI GAYSLESQIKYNNKL
.....

rc0110      GKTAVNGHLLSYLKLKELIKGFSLQITTSYGHNYIKRNRNINNIIGYQNNLSFQTL
mci_04765  GKTAVNGHLLSYLKLKELIKGFSLQITTSYGHNYIKRNRNINNIIGYQNNLSFQTL
.....

rc0110      NYKYRTKYDLHFIPIGQYDYSRASNYKEYNVDIENLMIQKSNQLESSLGKIVKFP
mci_04765  NYKYRTKYDLHFIPIGQYDYSRASNYKEYNVDIENLMIQKSNQLESSLGKIVKFP
.....

rc0110      IVTTNIVLPSLYGNI EHHFNKNTKVAKATFKQGTLOETIITLHKPLGNYI GSNIL
mci_04765  IVTTNIVLPSLYGNI EHHFNKNTKVAKATFKQGTLOETIITLHKPLGNYI GSNIL
.....

rc0110      MSKHNIVLLEYNYTHRYQSHQGLIKLVNL
mci_04765  MSKHNIVLLEYNYTHRYQSHQGLIKLVNL
.....

```

**Supplementary Figure 8 | Amino acid sequence alignment of Sca2 protein from *R. conorii* and *R. montanensis*.** Amino acid sequences of rickettsial Sca2 from *R. conorii* (RC0110) and *R. montanensis* (MCI\_04765) were aligned using the ClustalW software. The alignment resulted in a percentage of sequence identity of 88.47 %.

```
rco_RCI085      MAQKPNELKLLISAGLVTASTATIVASFAGSAMGAAIQQRRTTNAVATTVDGFGDQTAV
rmo_MCI_02705  MAQKPNELKLLISAGLVTASTATIVASFAGSAMGAATQNRRTTNGAATTVDGFGDQTAA
*****
rco_RCI085      FANVAVFLNAVITAGVNGKILINTPAGSFNGLELNTANNLQVTRVREDTTLGFIITVNVNA
rmo_MCI_02705  QVNAVAVFNAVITANANNGINFNTPAGSFNGLELGTANNLAVTVSADTTLGFVTNVANNG
*.*.*.*.*
rco_RCI085      NHENLMLNAGHTLITIGQGITVVOAATKHNAAVVAQVNGGAAIINNDLQVGRIDCGAA
rmo_MCI_02705  NSFNLTLAGHTLITIGQGITNAQAAVTVNAQVVAQVNGGAVANNNDLQVGVGIDFGAA
*.*.*.*.*
rco_RCI085      ASTLVFNLANFTTQKAPLILGDNVAVVNGANGTINVINGFIKVSFKSFPATVNVINIGDQ
rmo_MCI_02705  ASTLVFNLANFTTQKAPLILGDNVAVVNGANGTINVINGFIQVSDKSFATVHAINIIGDQ
*****
rco_RCI085      GIMFNTDADN-VNTLNLQANGATITFNGDGTGRLLVLSKNAATDFNVTGSLGGNKGFI
rmo_MCI_02705  GFIFNNTVAAGSALNLQVGGATINFNHGTGTGRLLVLSKNGAATDFNVTGSLGGNKGFI
*.*.*.*.*
rco_RCI085      IEFNTVAVNGQLKAGNAAVIGTNNAGRAAGFVSVVNGKQVATIDGQVYAKDMVIOQ
rmo_MCI_02705  IEFNTVAVAGQLIANGFNAVIGTNNAGRAAGFVSVVNGKNAATITGQVYAKDMVIOQ
*****
rco_RCI085      ANAVGQVNFHVIDVGTGGTAFKTAASKVAITQNSNFGTTDFGNLAAQIIVENTMTLNG
rmo_MCI_02705  ANAVGQVNFHVIDVGTGGTAFKTAASKVAITQNSNFGTTDFGNLAAQIIVPMTLNG
*****
rco_RCI085      NFGDASNFGNTAGVITFDANGTASASADANVAVTNNITAIASAGGVQLSGTHAEL
rmo_MCI_02705  NFGDASNPENTAGVITFAANGTASASADANVAVTNNITAIASAGGVQLSGTHAEL
*****
rco_RCI085      RLGNAGSVFKLADGTVINGKVNQTVAVGGALAAAGITLDGSATITGDI GNAGGAALQGI
rmo_MCI_02705  RLGNAGSVFKLADGTVINGKVNQTVAVGGALAAAGITLDGSATITGDI GNAGGAALQGI
*****
rco_RCI085      TLANDATKTLTGGANIIGANGGTINFGANGSTIKLSTQNNIVVDFDLAIATDQTVGD
rmo_MCI_02705  TLANDATKTLTGGANIIGANGGTINFGANGSTIKLSTQNNILVDFDLAINHDFQTVGD
*****
rco_RCI085      ASSLTNAQTLITNGKIGTVGANNKLGQFNIGSSKTVLSDVDVAINELVIGNGVAFH
rmo_MCI_02705  ASSLTNAQTLITNGKIGTVGANNKLGQFNIGSSKTVLSDVDVAINELVIGNGVAFH
*****
rco_RCI085      NTYLLTRTNAAGQGIIFNFPVNNNTLTAOTNLGSAANPLAEINFGSKGAANVDTVLN
rmo_MCI_02705  DTYLLTRTNAAGQGIIFNFPVNNNTLTAAGTNLGSANPLAEINFGSK-GAHADITLN
*.*.*.*.*
rco_RCI085      VGGKVNLYATNITTTDAMVGSFIFNAGGTVVSGTVGGQQGNKFNVALINGTIVKFLGN
rmo_MCI_02705  VGGKVNLYATNITTTDAMVGSFVFNAGGTVVSGTVGGQQGSKFNVALINGTIVKFLGN
*****
rco_RCI085      AFNNGNTTIAANSVLQIGNVTADFVASADGTGIEFVNTGPIVTLNKAAPVIALKRI
rmo_MCI_02705  AMENGKTIEAKSTLQIGNVTADFVASADGTGIEFVNTGPIVTLNKAAPVIVLQKM
*.*.*.*.*
rco_RCI085      TVSGGRVVIENLGNAGNHHGAVDTIAFENSSLGAVFLPRGIFPNDAGNRIPLTIKST
rmo_MCI_02705  TVSGGRVVIENLGNAGNHHGAVDTIAFENSSLGATLFLPSGIFPNDVT-----IKST
*****
rco_RCI085      VGNKATGDFVFSVIVLVDSVIADQVIGDQNNIVGLGLGSENDIIVNATTLVAGIT
rmo_MCI_02705  VGNKATGDFVFSVIVLVDSVIADQVIGDQNNIVGLGLGSENGIIVNATTLVAGIT
*.*.*.*.*
rco_RCI085      NNNGQTVLSSGIPHTPGTVYGLGTGIGASKFOVTFETDYNLGNIIATNATINDGVTV
rmo_MCI_02705  NNNGQTVLSSGIPHTPGTVYGLGDASASQLQVTFETDYNLGNIIATNATINDGVTV
*****
rco_RCI085      TTGGIAGIGEDGKITLGSVNGNVRFDVGLLSHSTSMIGTKANNQVTYLVGNAPVGN
rmo_MCI_02705  TTGGIAGTVFNKRTLGSVNGNVRFDVGLLSNSISMVITKANNQVTYLVGGAYVGI
*.*.*.*.*
rco_RCI085      GDSDFVAVSRFTGS---DGGAGLQGNISQVIDFGTYNLGINSNVI LGGGTTAINGK
rmo_MCI_02705  GASNTFVAVSRFTGSGTGSINGAVLQGNISQVIDFGTYDLDIVNSNVI LGGGTTAINGA
*.*.*.*.*
rco_RCI085      INLNTLTFASGSTLGNNTSIEETTLTLDGNI GHIVLAGARVATTTGTTIKVQND
rmo_MCI_02705  IDLCTNLTTFASGSTLGNNTSIEETTLTLDGNI GHIVLAGARVATTTGTTINVDK
*.*.*.*.*
rco_RCI085      ANANFSGTQTYTLIQQGARFNGTLGPFVVTGSRNRFVNYGLIRAANQDYVITRTNNAEN
rmo_MCI_02705  ANANFSGTQTYTLIQQGARFNGTLGDFEAVTGSNRFVNYGLIRAANQDYVITRTNVEN
*****
rco_RCI085      VVINDIANSFPGAQVGVNVTTFVATNTAAYNLLAKNSANSANFVGAIVTDTSAAI
rmo_MCI_02705  VVINDIASSTFGALGVGVNVTTFVATNTAAYNLLAKNSANSANFVGSIVTDTSAAV
*****
rco_RCI085      TNAQLDVAKDIAQLGNRLGALRYLGTPEAEMAGPEAGAI PAAVAAGDEAVINVAYGW
rmo_MCI_02705  TNAQLDVAKDIAQLGNRLGALRYLGTPEAEMAGPEAGAI PAAVAAGDEAVINVAYGW
*.*.*.*.*
rco_RCI085      AKFPYTDHQSKRKGGLAGYKAKTTGVIGLDTLANNLMIGAAIGITKTDIKHQDYKKGD
rmo_MCI_02705  AKFPYTDHQSKRKGGLAGYKAKTTGVYIGLDTLANNLMIGAAIGITKTDIKHQDYKKGD
*****
rco_RCI085      KTDVNGFSFSLYGAQQLVNFPAQGSIAFSLNQQVKNKSQRYFFDANGNMSKQIAAGHYDN
rmo_MCI_02705  KTDVNGFSFSLYGAQQLVNFPAQGSIAFSLNQQVKNKSQRYFFDANGNMSKQIAAGHYDN
*****
rco_RCI085      MTFGGNLTVGYDYNAMQGVLVTPMAGLSVLKSSDENYKGTGTVANKQVNSKFSDRDILI
rmo_MCI_02705  MTFGGNLTVGYDYNAMQGVLVTPMAGLSVLKSSDENYKGTGTVANKQVNSKFSDRDILI
*****
rco_RCI085      VGAKVAGTMMNITDLAVPEVHAFVHHKVTGRLSKTSVLDQVTPCISQSDRTARTSYN
rmo_MCI_02705  VGAKVAGTMMNITDLAVPEHAFVHHVGRLSKTSVLDQVTPCISQSDRTARTSYN
*****
rco_RCI085      LGLSASIRSDARMEYIGYDAQISSKYTAHQGT LKVRVNF
rmo_MCI_02705  LGLSASIRPDARMEYIGYDAQIASKYTAHQGT LKVRVNF
*****
```

**Supplementary Figure 9 | Amino acid sequence alignment of Sca5 protein from *R. conorii* and *R. montanensis*.** Amino acid sequences of rickettsial Sca5 from *R. conorii* (RC0019) and *R. montanensis* (MCI\_02705) were aligned using the ClustalW software. The alignment resulted in a percentage of sequence identity of 88.14 %.

```

rco_RC1270      MKRKNKFEISIAFILGIALGLYQNPDYFTNLISQKSLALSALQIKHYNISELSRSKV
rmo_MCI_03585  MKRRNKFIEISTAFILGIALGIYQNPDYFTNLISQKSLALPALQIKHYNISELSRSKV
                ***:***** *****:***** *****
rco_RC1270      STCFPPAGCTKFIANQIDKAEESIYMQAYGMSDALITTALINAQARGVKVRILLDRSNL
rmo_MCI_03585  STCFPPAGCTKFIANQIDKAEESIYMQAYGMSDELITTALINAQARGVKVRILLDRSNL
                ***** *****
rco_RC1270      KQKFSKLHELQRAKIDVDIDKVPGLAHNKVIIIDKKKVVITGSFNFTAADKRNAENVIII
rmo_MCI_03585  KQKFSKLHELQQAIDVGDIDKVPGLAHNKVIIIDKKKVVITGSFNFTAADKRNAENVIII
                *****:***** *****
rco_RC1270      EDQELAESYLQNWLNKASN
rmo_MCI_03585  EDQELAESYLQNWLNKASN
                *****

```

**Supplementary Figure 10 | Amino acid sequence alignment of membranolytic phospholipase D protein from *R. conorii* and *R. montanensis*.** Amino acid sequences of rickettsial phospholipase D from *R. conorii* (RC1270) and *R. montanensis* (MCI\_03585) were aligned using the ClustalW software. The alignment resulted in a percentage of sequence identity of 96.50 %.

```

rmo_MCI_02955      MLKSSKKEDSSKKNQNNKLI FTVQKLFSP IKNFFRKT KTFDNFFGV IKR LKINSQKMTLD
rco_RC1141         MLKSSKKEDSSKKNQNNKLI FTVRKLFSP IKNFFRKT KTFDNFFGV IKR LKINSQKMTLD
*****:*****

rmo_MCI_02955      ERNILANLLELEDKTIEDIMVPRSDIAA IKLTTNLEELSES IKLEVPHTRTL IYDGTLDN
rco_RC1141         ERNILANLLELEDKTIEDIMVPRSDIAA IKLTTNLEELSES IKLEVPHTRTL IYDGTLDN
*****

rmo_MCI_02955      VVGFIHIKDLFKALATKQNGRLKKL I RKHIIAAPS MKLLDLLAKMRRERTHIA I VVDEYG
rco_RC1141         VVGFIHIKDLFKALATKQNGRLKKL I RKHIIAAPS MKLLDLLAKMRRERTHIA I VVDEYG
*****

rmo_MCI_02955      GTDGLVTIEDLIEEIVGRIDDEHDQQL DSDNFKVINNSTI IANARVEVEVLEEI IGEKLQ
rco_RC1141         GTDGLVTIEDLIEEIVGRIDDEHDQQL DSDNFKVINNSTI IANARVEVEVLEEI IGEKLH
*****:*****:

rmo_MCI_02955      NDDDEFDTIGGLV LTRVSSVPAIGTRIDISENIEIEVTDAT PRSLKQVKIRLKNGLNGK
rco_RC1141         NDYDEFDTIGGLV LTRVSSVPAIGTRIDISENIEIEVTDAT PRSLKQVKIRLKNGLNGQ
** *****:

```

**Supplementary Figure 11 | Amino acid sequence alignment of haemolysin C protein from *R. conorii* and *R. montanensis*.** Amino acid sequences of rickettsial haemolysin C from *R. conorii* (RC1141) and *R. montanensis* (MCI\_02955) were aligned using the ClustalW software. The alignment resulted in a percentage of sequence identity of 98.34 %.

**Supplementary Table 1 | Primers and probes used in q-PCR assays.**

| <b>Primer name</b> | <b>Primer sequence</b>                           | <b>Concentration of primer or probe in PCR reaction</b> |
|--------------------|--------------------------------------------------|---------------------------------------------------------|
| <b>Actin-F420</b>  | 5'-CCTGTATGCCTCTGGTCGTA-3'                       | 300 nM                                                  |
| <b>Actin-R681</b>  | 5'-CCATCTCCTGCTCGAAGTCT-3'                       | 300 nM                                                  |
| <b>Actin-Hex</b>   | 5'-/5MAXN/ACTGTGCCC/ZEN/ATCTAC-3'                | 200 nM                                                  |
| <b>Sca1-F5271</b>  | 5'-CAAGCTCGTTATTACCCCGAAT-3'                     | 300 nM                                                  |
| <b>Sca1-R5371</b>  | 5'-CTACCGCTCCTTGGAATGTTAGACC -3'                 | 300 nM                                                  |
| <b>Sca1-Fam</b>    | 5'-/56-<br>FAM/TCGGCTTAA/ZEN/GATACGGGAAGT-<br>3' | 200 nM                                                  |
